# Supplementary material for: A virtual lymph node model to dissect the requirements for T-cell activation by synapses and kinapses
Source: PubMed Central journal article supplement — Immunol Cell Biol. 2016 May 10;94(7):680–8. doi: 10.1038/icb.2016.36 (PMC4980574; doi:10.1038/icb.2016.36), 2016-05-10
Supplement: icb201636x1.pdf [file icb201636x1.pdf]

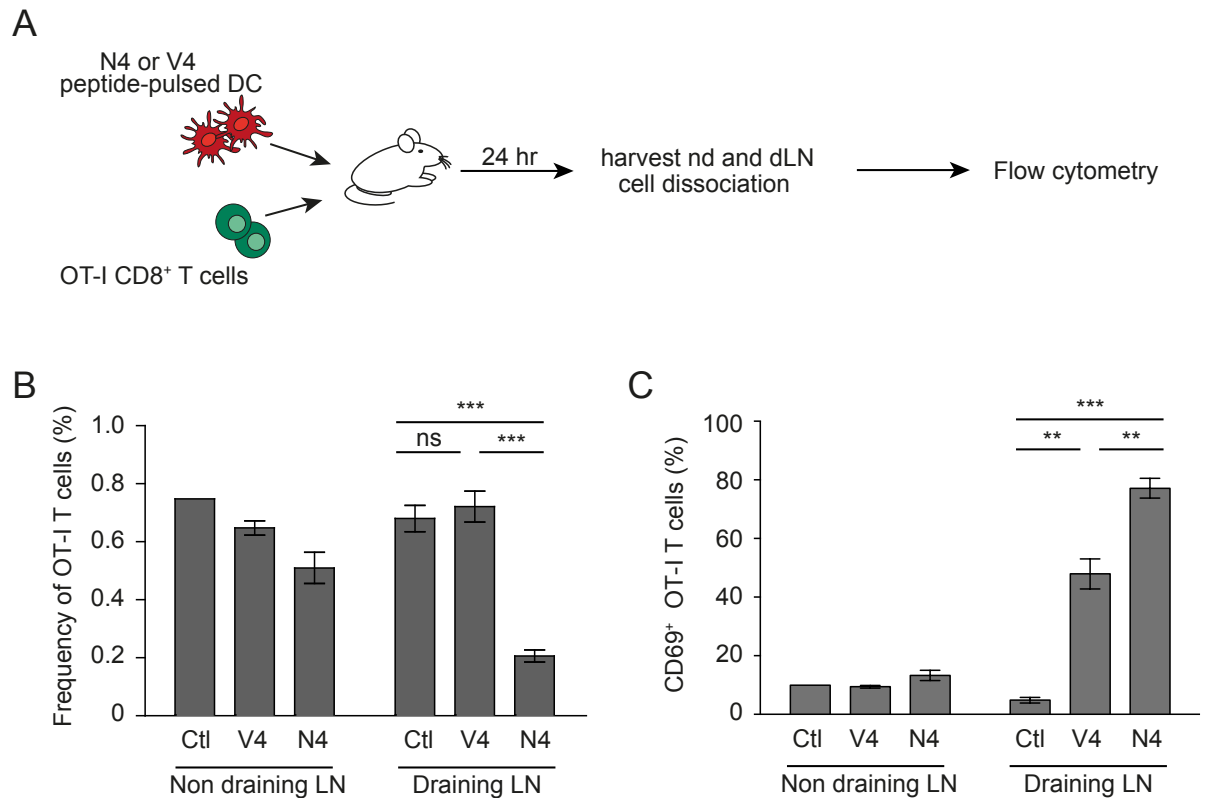

**Supplementary figure 1: Low and high affinity peptide both trigger T cell activation but distinct contact stability.** A) Experimental set-up. N4 or V4 peptide-pulsed DCs were injected in the footpad (or unpulsed DCs as a control), while CFSE labeled OT-I T cells were injected intravenously. After 24hr, draining and non-draining lymph nodes were collected, cell suspensions were prepared and analyzed by FACS. B) OT-I T cells are retained in dLN by strong interactions with high affinity peptide-presenting DCs. Graph shows the percentage of OT-I T cells (CFSE<sup>+</sup>) in draining and non-draining LN. C) Most OT-I T cells have received activation signals at 24hr. Graph shows the percentage of CD69<sup>+</sup> OT-I T cells.
